# Supplementary material for: N-Acetyltransferase 10 represses Uqcr11 and Uqcrb independently of ac4C modification to promote heart regeneration
Source: PubMed Central journal article supplement (PMC10923914; doi:10.1038/s41467-024-46458-7), 2024-03-08
Supplement: 41467_2024_46458_MOESM1_ESM.pdf [file 41467_2024_46458_MOESM1_ESM.pdf]

# N-Acetyltransferase 10 represses Uqcr11 and Uqcrb independently of ac4C modification to promote heart regeneration

## Supplementary Figures

### Supplementary Fig. 1

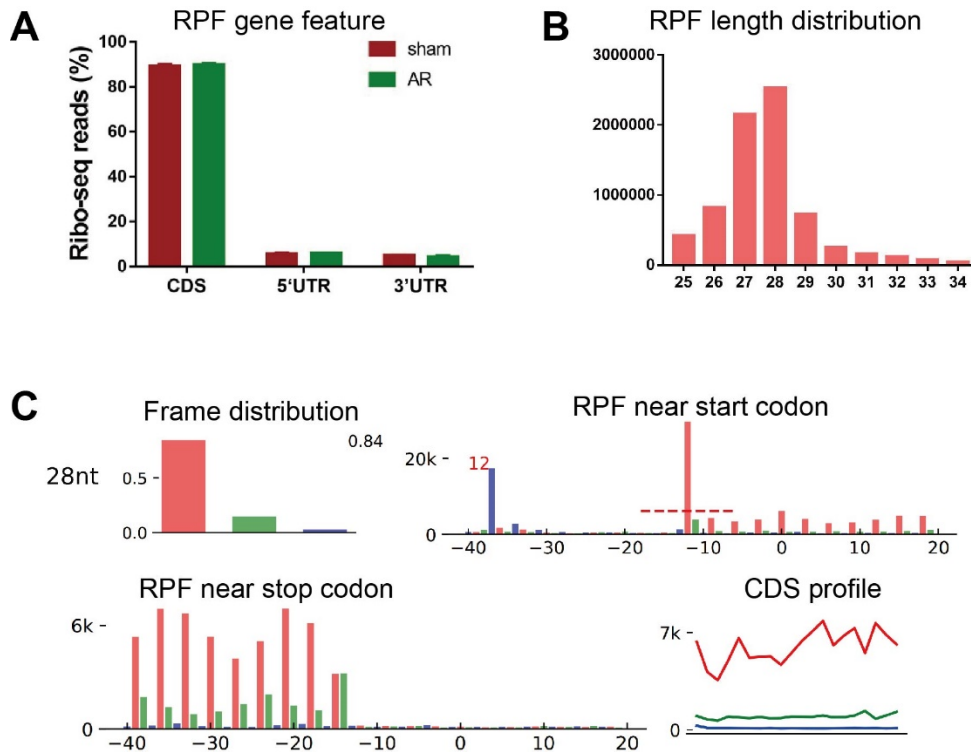

**Supplementary Figure 1. The analysis of RPF.** **A** The RPFs distributes in the CDS, 5'UTR and 3'UTR. **B** The RPF length distribution. **C** The ribosome footprint positions analysis shows the percentage of footprints that match these primary reading frames, the P-site positions, the 3-nt periodicity, and the CDS profile. Source data are provided as a Source Data file.

Supplementary Fig. 2

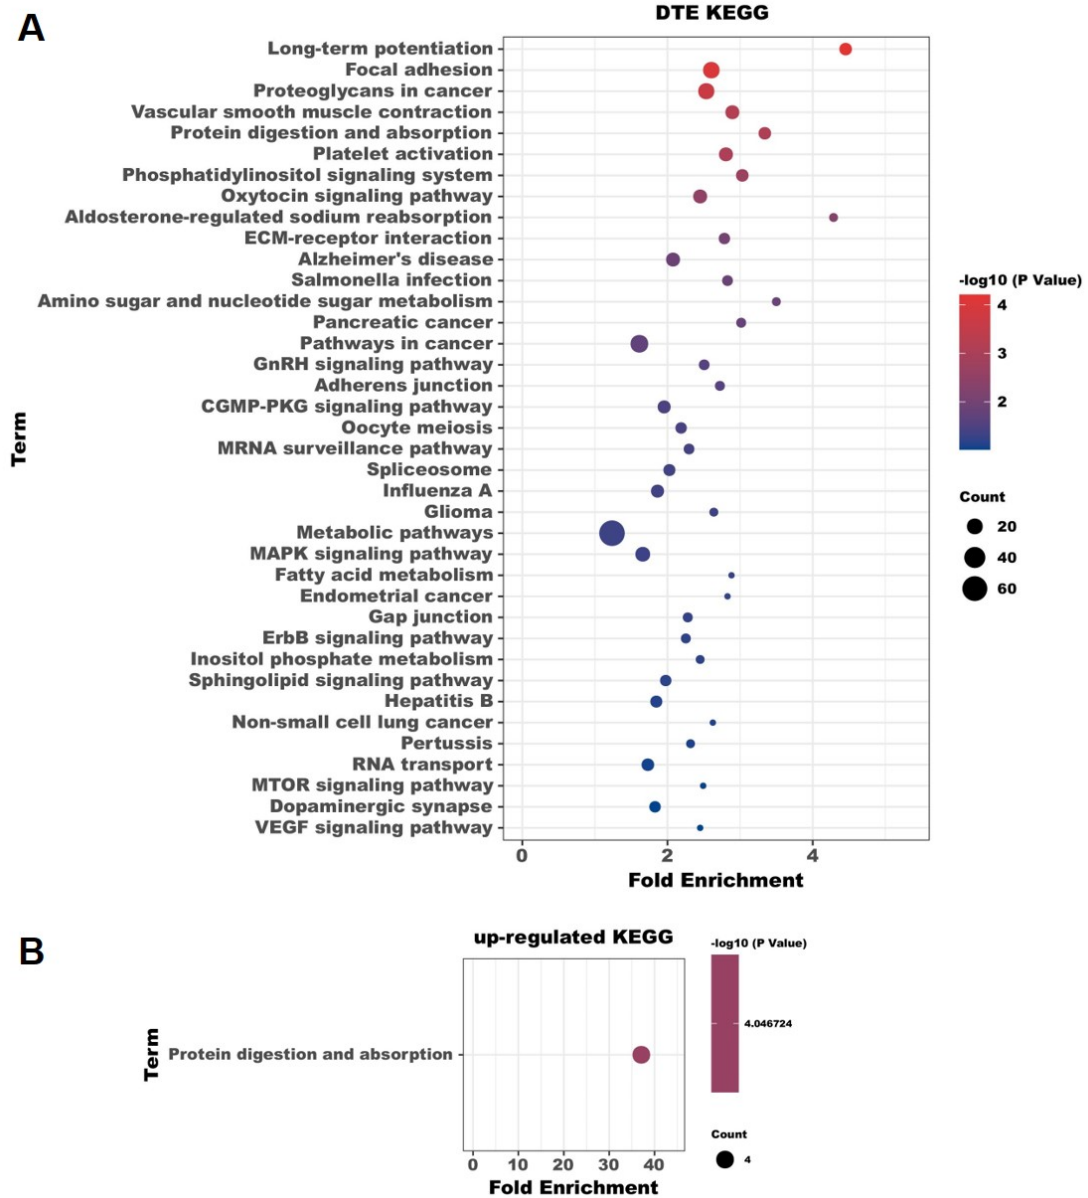

**Supplementary Figure 2. The KEGG analysis.** **A** KEGG analysis of differentially expressed TE. **B** KEGG analysis of genes with up-regulated translation by DAVID (<https://david.ncifcrf.gov/home.jsp>) and HILOT (<https://hiplot.com.cn/cloud-tool/drawing-tool/list>). Source data are provided as a Source Data file.

Supplementary Fig. 3

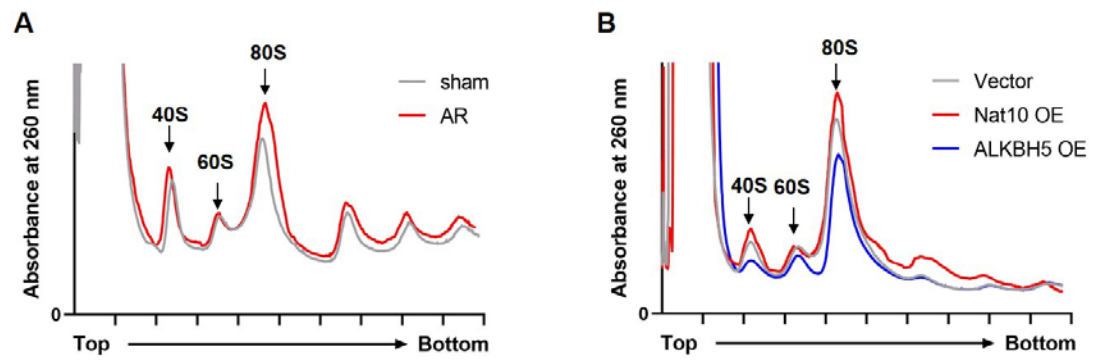

**Supplementary Figure 3. A and B** The A254 absorbance data of Polysome profiling analyses. Source data are provided as a Source Data file.

## Supplementary Fig. 4

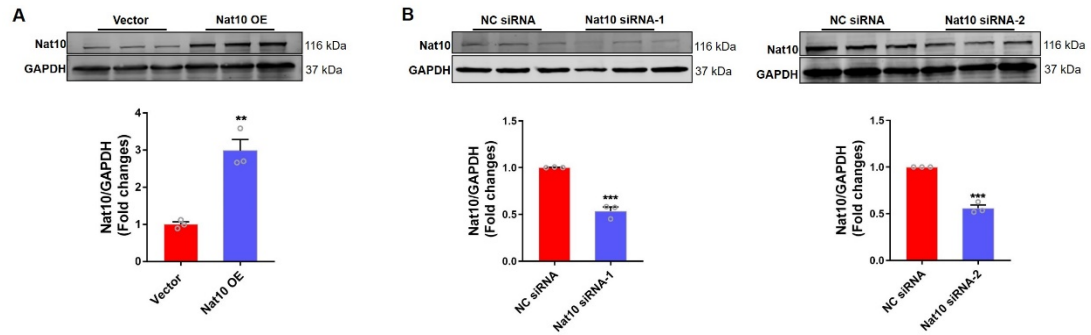

**Supplementary Figure 4.** The expression of Nat10 in cardiomyocytes transfected with Nat10 overexpression plasmid and siRNA. Source data are provided as a Source Data file. **A** Two-tailed Student's t test. \*\* $p < 0.01$  vs. Vector. **B** Two-tailed Student's t test with Welch's correction. \*\*\* $p < 0.001$  vs. NC siRNA.  $n=3$ . Data are presented as mean  $\pm$  SEM.

Supplementary Fig. 5

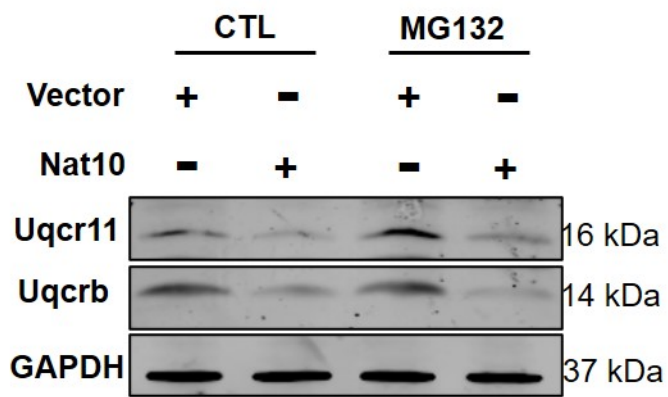

**Supplementary Figure 5.** The effect of Nat10 on Uqcr11 and Uqcrb protein degradation.

Supplementary Fig. 6

**PACES** Prediction of acetylation sites in mRNA

Result:

| Gene   | Sequence             | Start | End | Score thresholds: |
|--------|----------------------|-------|-----|-------------------|
| Uqcr11 | no acetylated region |       |     | null              |

  

| Gene  | Sequence             | Start | End | Score thresholds: |
|-------|----------------------|-------|-----|-------------------|
| Uqcrb | no acetylated region |       |     | null              |

  

| Gene   | Sequence             | Start | End | Score thresholds: |
|--------|----------------------|-------|-----|-------------------|
| Atp5j2 | no acetylated region |       |     | null              |

**Supplementary Figure 6. The prediction of ac4C modification.** The ac4C modification sites in Uqcr11, Uqcrb, and Atp5j2 mRNAs were predicted with 99% specificity by PACES (<http://www.rnanut.net/paces/>).

Supplementary Fig. 7

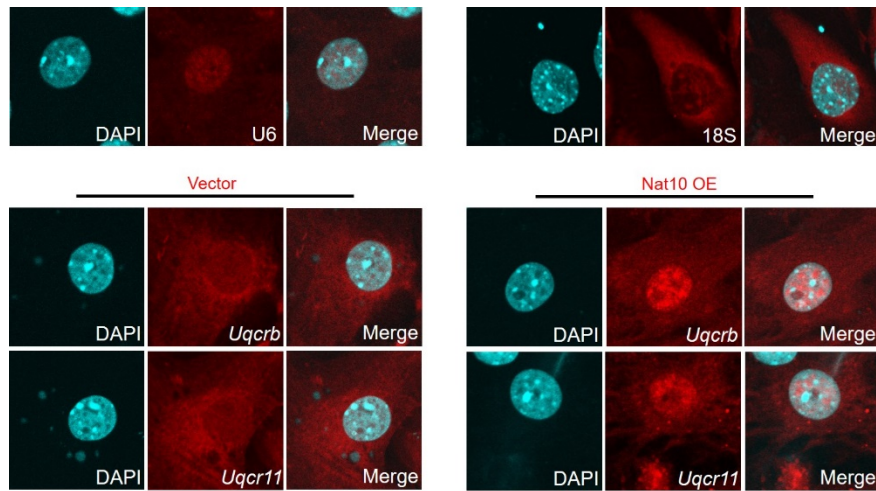

**Supplementary Figure 7. The distribution of *Uqcr11* and *Uqcrb* between the nucleus and cytoplasm. The RNA localization of *Uqcr11* and *Uqcrb* assessed using FISH.**

Supplementary Fig. 8

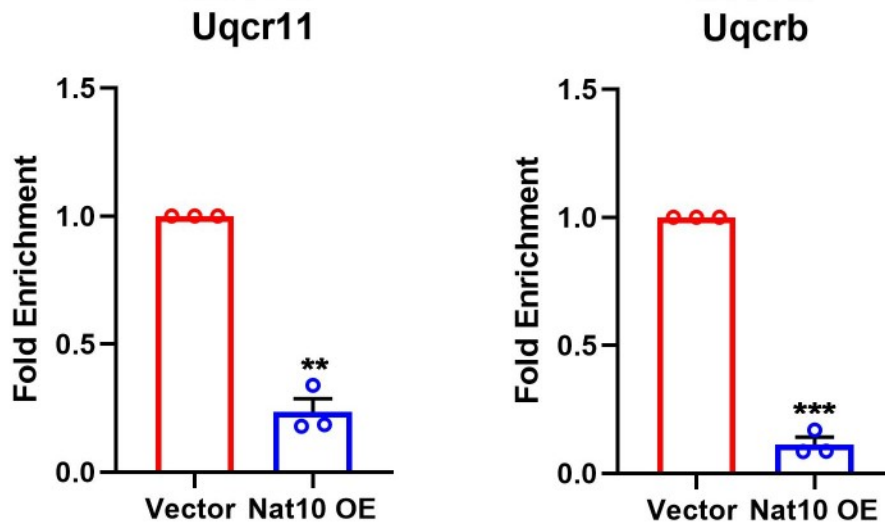

**Supplementary Figure 8. The interaction of Uqcr11 and Uqcrb mRNAs with the Nuclear RNA Export Factor 1 (Nxf1).** Nxf1 RIP analysis of Uqcr11 and Uqcrb (n=3). Two-tailed Student's t test with Welch's correction. \*\* $p < 0.01$ , \*\*\* $p < 0.001$  vs. Vector. Data are presented as mean  $\pm$  SEM. Source data are provided as a Source Data file.



## Supplementary Fig. 9

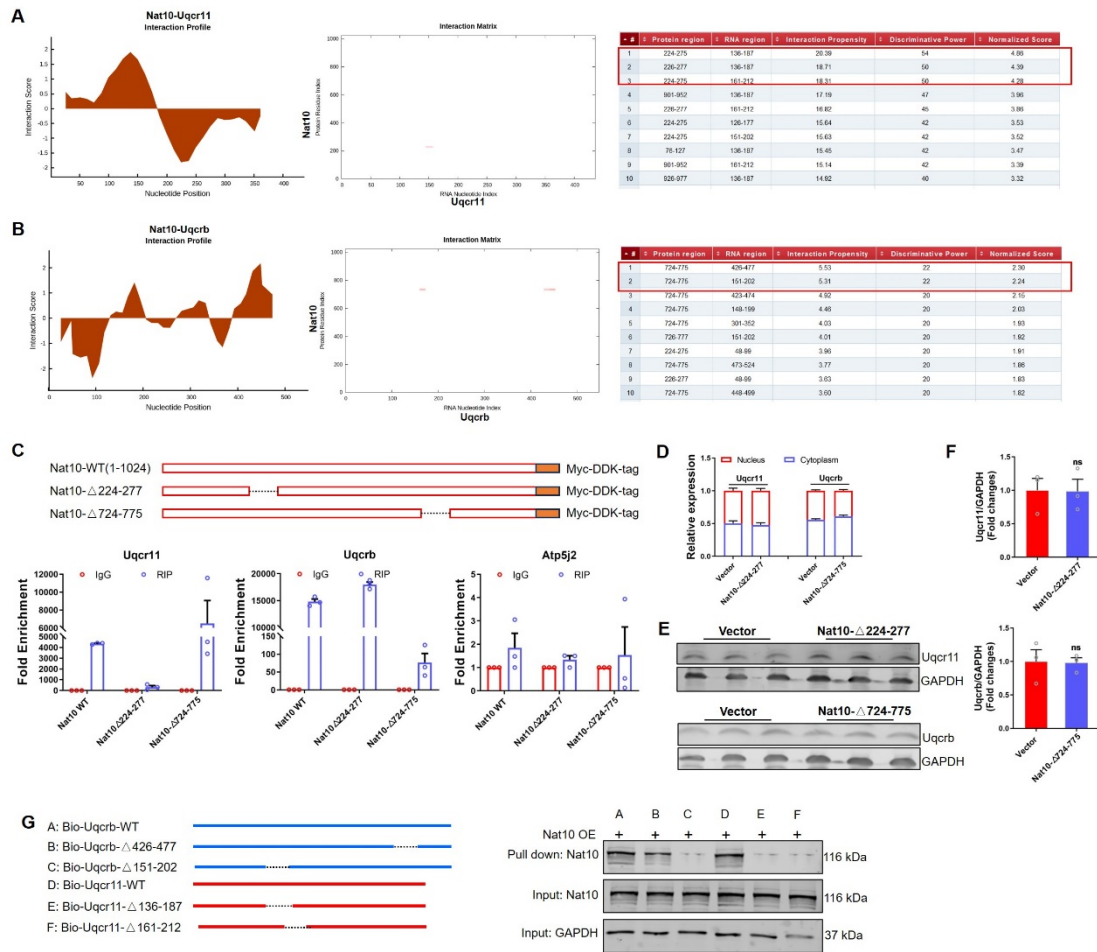

**Supplementary Figure 9. The identification of the specific interaction of Nat10 with Uqcr11 and Uqcrb.** **A** and **B** The prediction of the binding sites between Nat10 and Uqcr11 or Uqcrb using the catRAPID algorithm. **C** The interaction of mutant Nat10 with Uqcr11 and uqcrb mRNA (n=3). **D** The distribution of Uqcr11 and Uqcrb between the nucleus and cytoplasm (n=3). **E** and **F** Western blot analysis of Uqcrb and Uqcr11 (n=3). **G** The interaction of mutant Uqcr11 and Uqcrb mRNAs with Nat10 protein. Two-tailed Student's t test. Data are presented as mean  $\pm$  SEM. Source data are provided as a Source Data file.

Supplementary Fig. 10

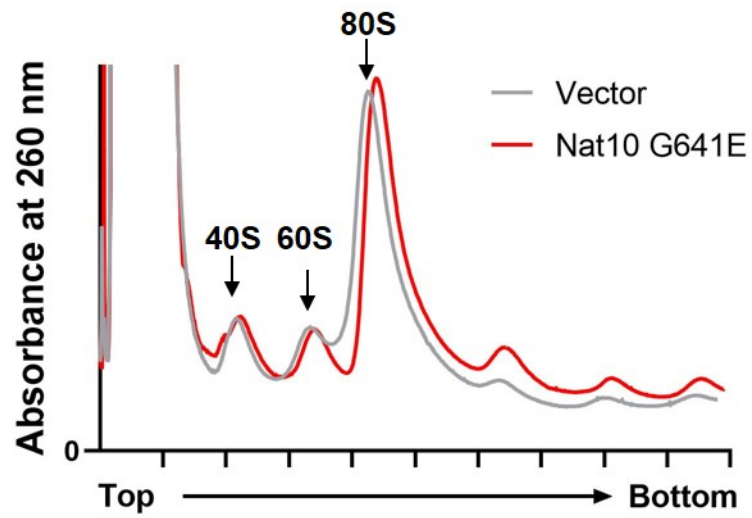

**Supplementary Figure 10.** The A254 absorbance data of Polysome profiling analyses.

Source data are provided as a Source Data file.

Supplementary Fig. 11

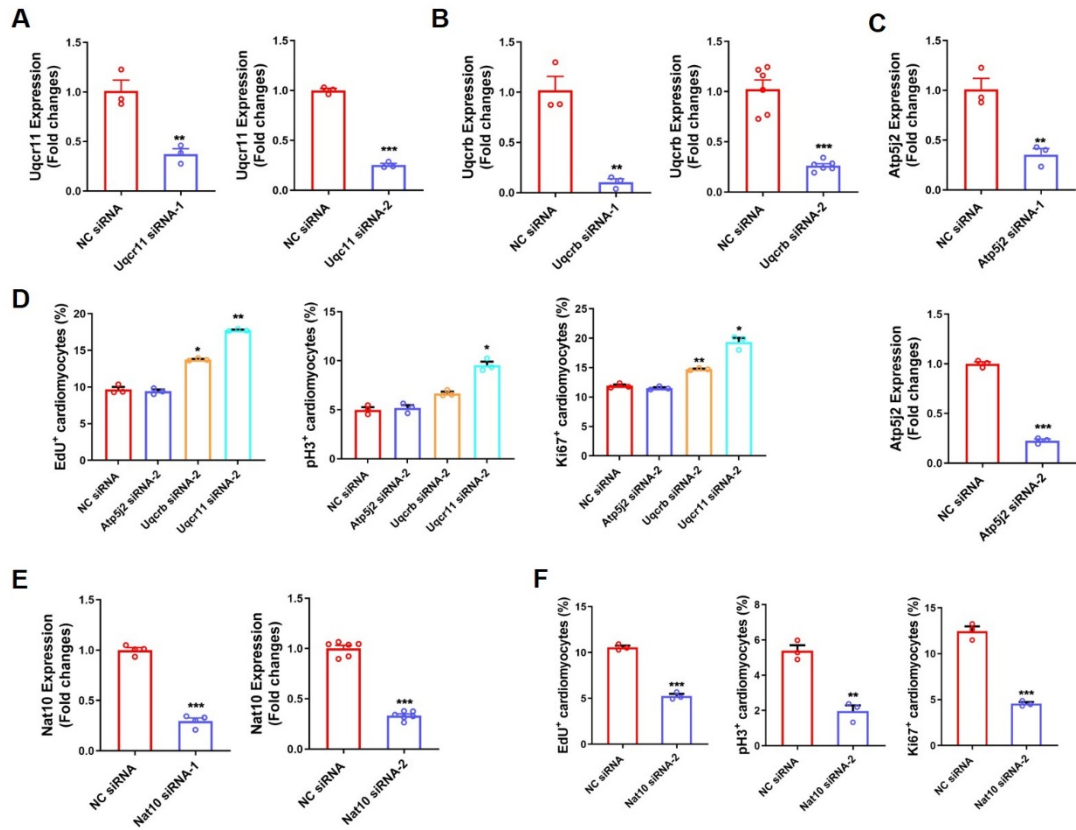

**Supplementary Figure 11. The effects of Nat10, Uqcrb, Uqcr11 and Atp5j2 siRNA on cardiomyocyte proliferation.** A-C and E the transfection efficiency of Nat10, Uqcrb, Uqcr11 and Atp5j2 siRNAs (n=3, 4, 6). Two-tailed Student's t test. \*\* $p < 0.01$ , \*\*\* $p < 0.001$  vs. NC siRNA. **D** and **F** The effects of Nat10, Uqcrb, Uqcr11 and Atp5j2 siRNA on cardiomyocyte proliferation analyzed by the detection of EdU, pH3 and Ki67 (n=3). one-way ANOVA followed by Dunnett's Multiple Comparison tests (D), Two-tailed Student's t test (F). \* $p < 0.05$ , \*\* $p < 0.01$ , \*\*\* $p < 0.001$  vs. NC siRNA. Data are presented as mean  $\pm$  SEM. Source data are provided as a Source Data file.

Supplementary Fig. 12

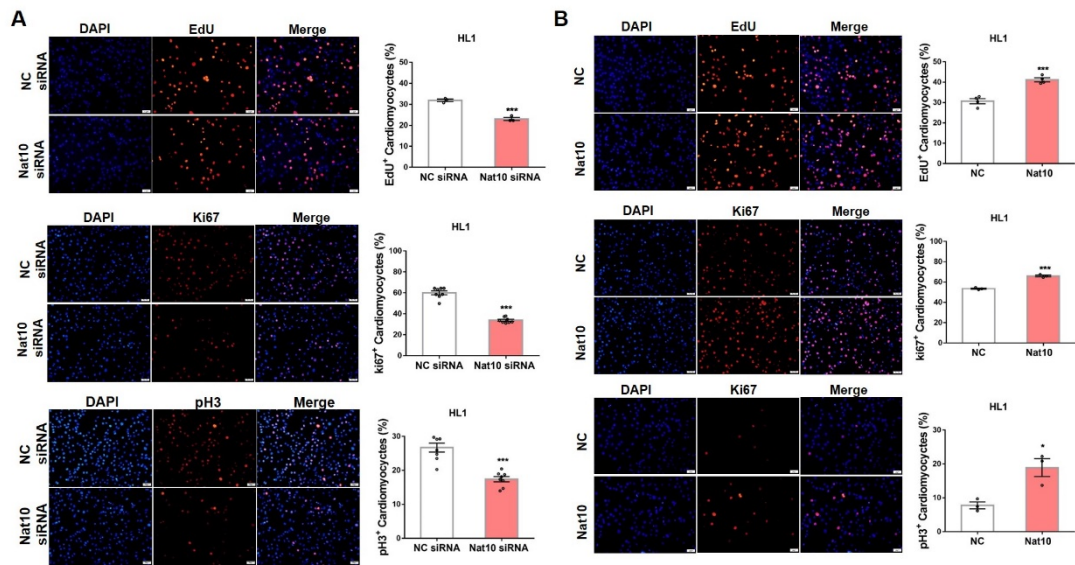

**Supplementary Figure 12. The effects of Nat10 on HL1 cell proliferation. A and B** The effects of Nat10 knockdown and overexpression on HL1 proliferation analyzed by the detection of EdU, pH3 and Ki67 (n=3, 8). Two-tailed Student's t test. \* $p < 0.05$ , \*\*\* $p < 0.001$  vs. NC siRNA or NC. Data are presented as mean  $\pm$  SEM. Source data are provided as a Source Data file.

Supplementary Fig. 13

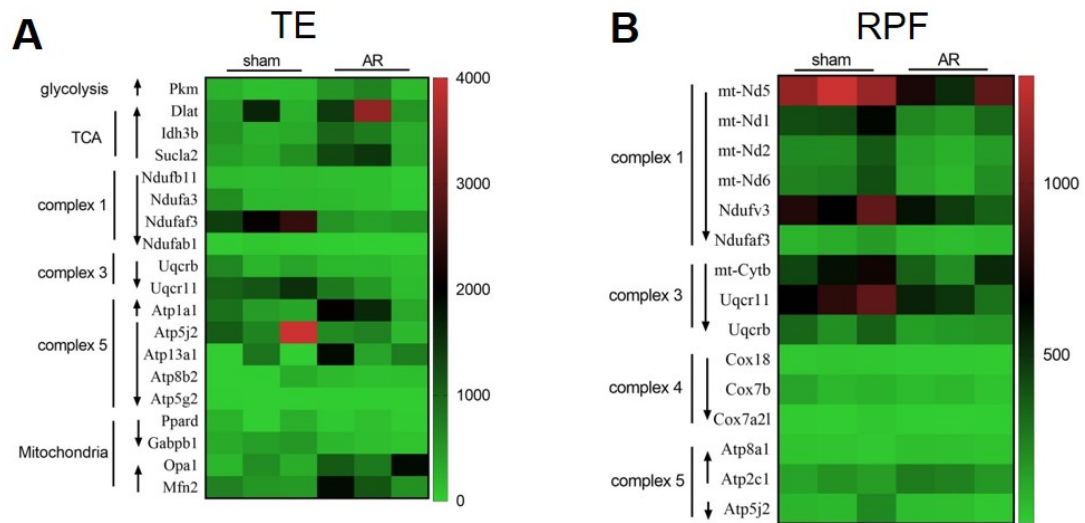

**Supplementary Figure 13. Oxidative phosphorylation related genes in Ribo-seq. A and B** Heatmaps of differentially expressed RPFs and TE of mitochondrial complex components related to oxidative phosphorylation and glycolysis-related gene in Ribo-seq. Source data are provided as a Source Data file.

Supplementary Fig. 14

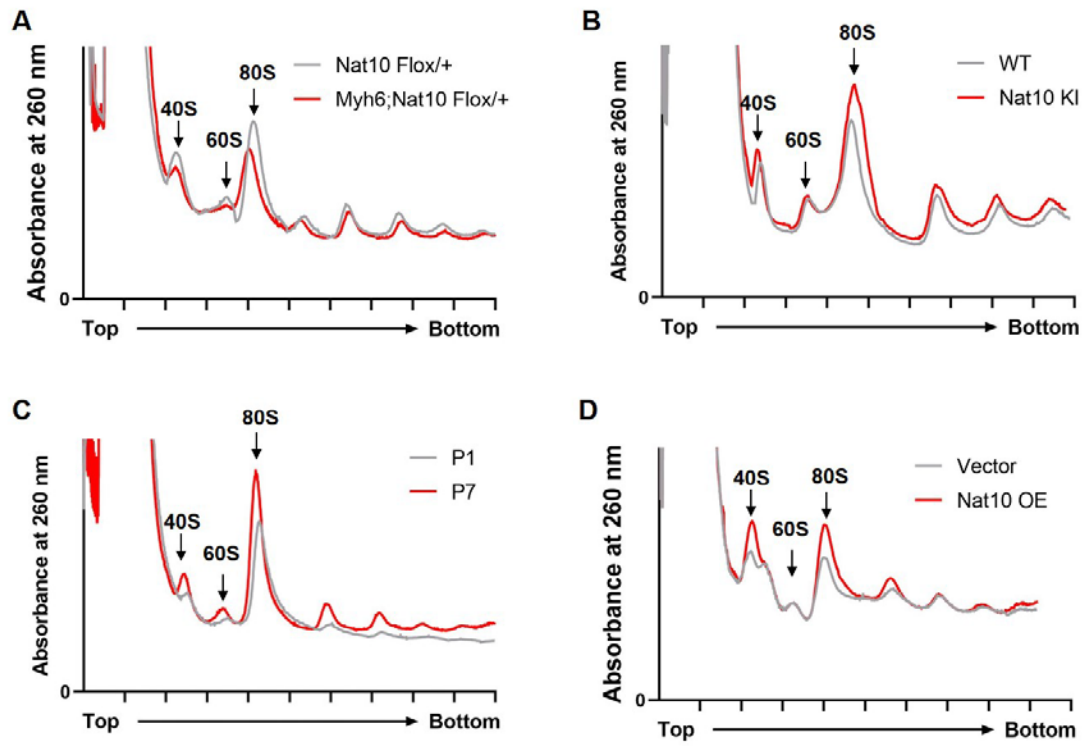

**Supplementary Figure 14.** A-D The A254 absorbance data of Polysome profiling analyses. Source data are provided as a Source Data file.

Supplementary Fig. 15

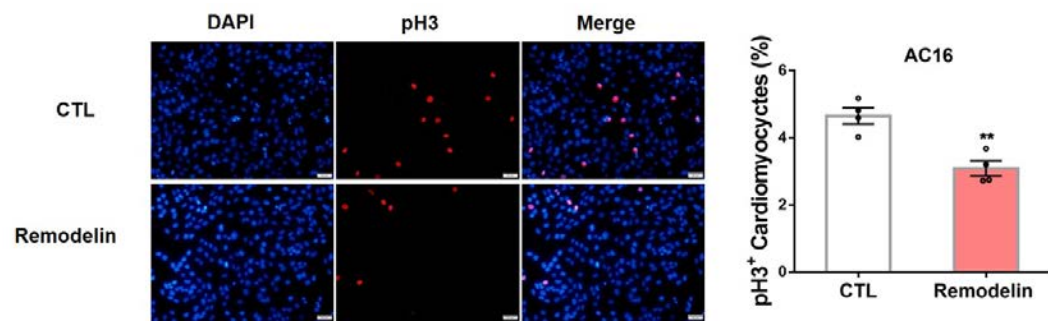

**Supplementary Figure 15. The effects of Remodelin on AC16 cell proliferation.**

pH3 staining.  $**p < 0.01$  vs. CTL. Two-tailed Student's t test. Data are presented as mean  $\pm$  SEM. Source data are provided as a Source Data file.

Supplementary Fig. 16

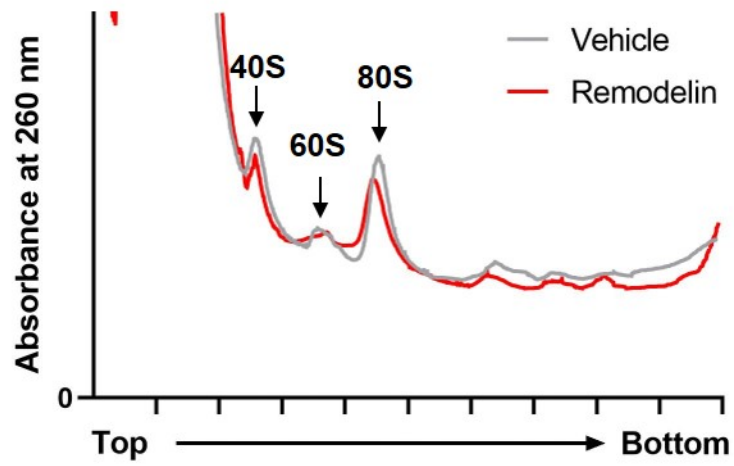

**Supplementary Figure 16.** The A254 absorbance data of Polysome profiling analyses.

Source data are provided as a Source Data file.



Supplementary Fig. 17

**A**

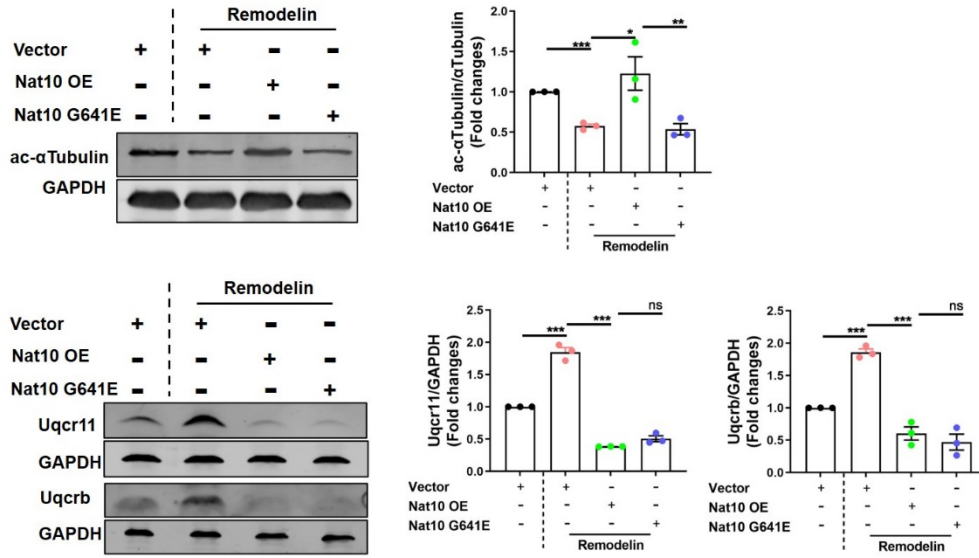

**B**

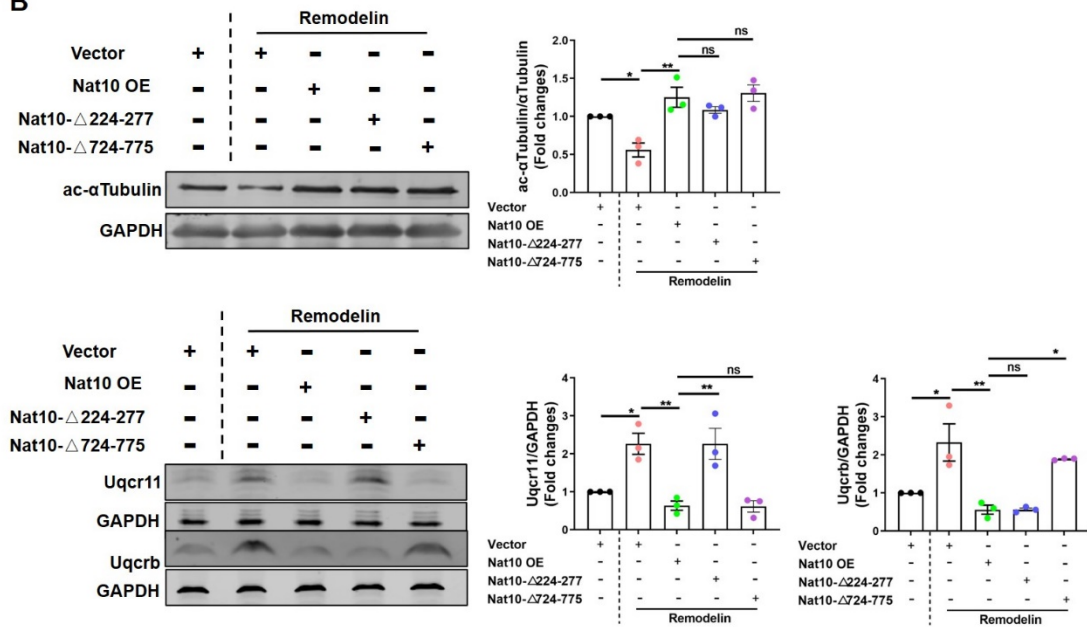

**Supplementary Figure 17. A and B** The effect of Remodelin on the expression of ac- $\alpha$ -tubulin, Uqcr11 and Uqcrb. \* $p < 0.05$ , \*\* $p < 0.01$ , \*\*\* $p < 0.001$ . Data are presented as mean  $\pm$  SEM. Source data are provided as a Source Data file.

Supplementary Fig. 18

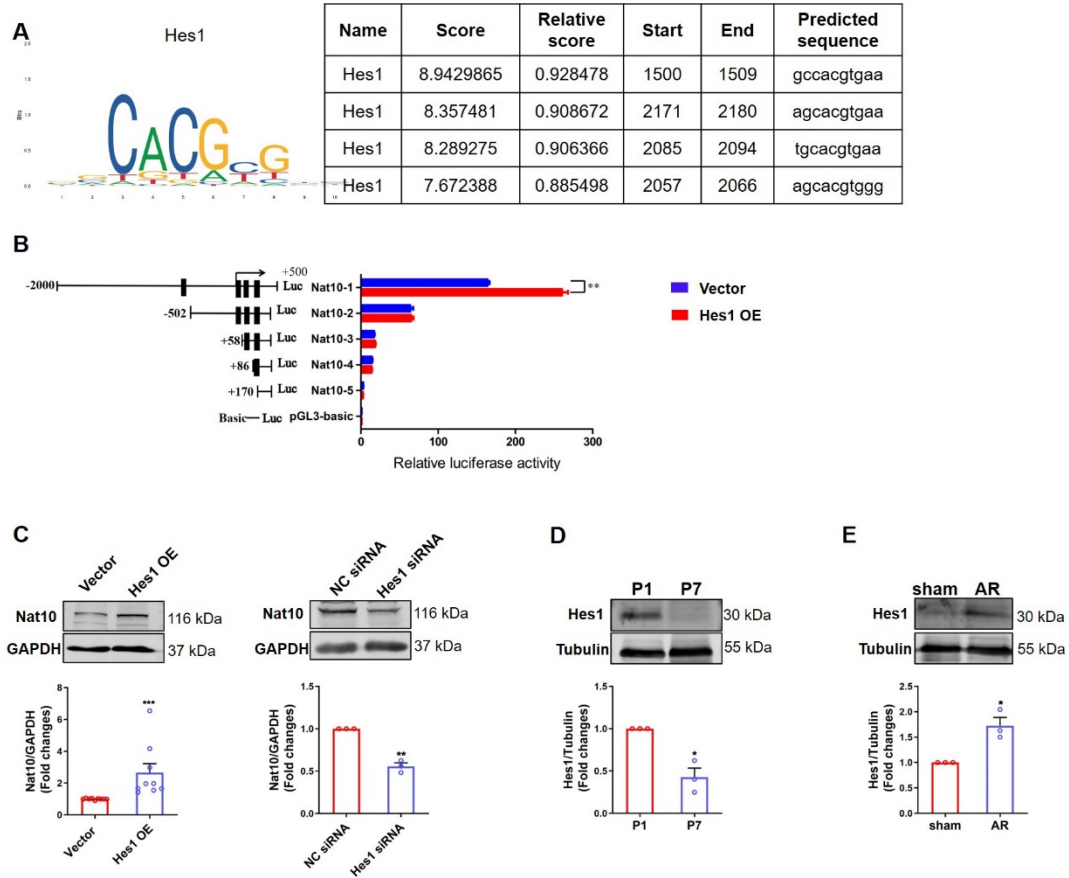

**Supplementary Figure 18. The expression of Nat10 is regulated by Hes1.** **A** The prediction of Hes1 binding to the promoter region of Nat10 by both PROMO ([https://alggen.lsi.upc.es/cgi-bin/promo\\_v3/promo/promoinit.cgi?dirDB=TF\\_8.3](https://alggen.lsi.upc.es/cgi-bin/promo_v3/promo/promoinit.cgi?dirDB=TF_8.3)) and JASPAR (<http://jaspar.genereg.net/>) coupled with UCSC Genome Browser (<http://genome.ucsc.edu>). **B** The luciferase assay indicating the interaction of Hes1 with the promoter of Nat10. **C** The effects of Hes1 knockdown and overexpression on Nat10 protein expression. **D** The expression of Nat10 in P1 and P7 heart tissues. **E** The expression of Nat10 in hearts of sham and AR mice. Two-tailed Student's t test (C, D, and E). \* $p < 0.05$ , \*\* $p < 0.01$ , \*\*\* $p < 0.001$ . Data are presented as mean  $\pm$  SEM. Source data are provided as a Source Data file.
